# Supplementary material
Source: publisher figshare collection journal article supplement (https://wiley.figshare.com/articles/dataset/_/3529304)
Supplement: Supplementary file 1 [file 1 › appendix-A.htm]

Ecological Archives E089-074-A1


### *Ecological Archives* E089-074-A1

### **Devin S. Johnson, Joshua M. London, Mary-Anne Lea, and John W. Durban. 2008. Continuous-time correlated random walk model for animal telemetry data. *Ecology* 89:1208–1215.**

Appendix A. Mathematical details of the continuous-time correlated random walk (CTCRW) model. Click here for a PDF file of the appendix.

---


[Back to E089-074]
