# Supplementary material
Source: publisher figshare collection journal article supplement (https://wiley.figshare.com/articles/dataset/_/3529304)
Supplement: Supplementary file 1 [file 1 › appendix-A.pdf]

*Ecological Archives* E089-074-A1

**Devin S. Johnson, Joshua M. London, Mary-Anne Lea, and John W. Durban. 2008. Continuous-time correlated random walk model for animal telemetry data. *Ecology* 89:1208–1215.**

Appendix A. Mathematical details of the continuous-time correlated random walk (CTCRW) model.

## Appendix A: Mathematical Details of the CTCRW Model

### *Discretizing the continuous-time model*

Here we present the details of discretizing the continuous-time CRW (CTCRW) model into a form which can be placed into a discrete-time state-space model, so that the fast Kalman filter and smoother can be used for estimation and smoothing. Durbin and Koopman (2001) present a similar approach for discretizing an integrated Brownian motion process for state-space analysis. Here, we modify their derivation for use on an integrated Ornstein-Uhlenbeck (OU) process.

First, we define the velocity process  $\nu(t)$  and the position process  $\mu(t)$  as a function of a Brownian motion process (note, we have left off the coordinate notation for simplicity),

$$\nu(t) = \gamma + \frac{\sigma e^{-\beta t}}{\sqrt{2\beta}} W(e^{2\beta t}) \quad (\text{A.1})$$

and

$$\begin{aligned} \mu(t) &= \mu(0) + \int_0^t \nu(u) du \\ &= \mu(0) + \gamma t + \frac{\sigma}{\sqrt{2\beta}} \int_0^t e^{-\beta u} W(e^{2\beta u}) du, \end{aligned} \quad (\text{A.2})$$

where  $\gamma$  is a constant over  $(0, t]$ ,  $\sigma$  and  $\beta$  are parameters, and  $W(\cdot)$  is a standard Brownian motion process with  $E[W(t)] = 0$ , variance  $V[W(t)] = t$ , and covariance  $C[W(s), W(t)] = \min(s, t)$ .

The discretization of the CTCRW model begins by assuming that the process is sampled at times  $t_1, \dots, t_n$ . Let  $\nu_i = \nu(t_i)$  for  $i = 1, \dots, n$ . Then, assuming  $\gamma_i$  is a constant over  $(t_i, t_{i+1}]$  and, for  $t \in (t_i, t_{i+1}]$ ,  $\nu(t)$  follows an OU process with mean  $\gamma_i$ , covariance parameters  $\sigma$  and  $\beta$ , and initial value  $\nu_i$ , we obtain the transition equation for  $\nu_{i+1}$

$$\begin{aligned} \nu_{i+1} &= \gamma_i + \frac{\sigma e^{-\beta t_{i+1}}}{\sqrt{2\beta}} W(e^{2\beta t_{i+1}}) \\ &= \nu_i e^{-\beta \delta_i} + \gamma(1 - e^{-\beta \delta_i}) + \frac{\sigma e^{-\beta t_{i+1}}}{\sqrt{2\beta}} \{W(e^{2\beta t_{i+1}}) - W(e^{2\beta t_i})\} \\ &= \nu_i e^{-\beta \delta_i} + \gamma(1 - e^{-\beta \delta_i}) + \zeta_i, \end{aligned} \quad (\text{A.3})$$

where

$$\zeta_i = \frac{\sigma e^{-\beta t_{i+1}}}{\sqrt{2\beta}} \{W(e^{2\beta t_{i+1}}) - W(e^{2\beta t_i})\} \quad (\text{A.4})$$

is a Gaussian random variable with  $E[\zeta_i] = 0$  and variance  $V[\zeta_i] = \sigma^2 \{1 - e^{-2\beta \delta_i}\} / 2\beta$ . The serial independence of the  $\zeta_i$  result from the independent increments property of the Brownian process. Note, that the OU process parameters were not indexed, but, in general

they might also vary by time intervals  $(t_i, t_{i+1}]$ . Even with shifts in mean or covariance, the process will remain smooth in continuous time. This can be seen by letting  $\delta_i \rightarrow 0$  and noting that  $\nu_{i+1} \rightarrow \nu_i$  for any  $\beta$ ,  $\sigma$ , or  $\gamma_i$  as long as they are constant over  $(t_i, t_{i+1}]$ . This allows for inclusion of covariates which can affect the velocity process; as in the harbor seal example.

By using the velocity process formulation above, the position process at  $t_{i+1}$ ,  $\mu_{i+1}$ , can be formulated in terms of the position and velocity process at time  $t_i$ ,

$$\begin{aligned}\mu_{i+1} &= \mu_i + \int_{t_i}^{t_{i+1}} \nu_i e^{-\beta(u-t_i)} + \gamma_i (1 - e^{-\beta(u-t_i)}) \\ &\quad + \frac{\sigma e^{-\beta u}}{\sqrt{2\beta}} \{W(e^{2\beta u}) - W(e^{2\beta t_i})\} du \\ &= \mu_i + \nu_i \left( \frac{1 - e^{-\beta \delta_i}}{\beta} \right) + \gamma_i \left( \delta_i - \frac{1 - e^{-\beta \delta_i}}{\beta} \right) + \xi_i,\end{aligned}\tag{A.5}$$

where

$$\xi_i = \frac{\sigma}{\sqrt{2\beta}} \int_{t_i}^{t_{i+1}} e^{-\beta u} \{W(e^{2\beta u}) - W(e^{2\beta t_i})\} du.\tag{A.6}$$

Again, due to the independent increments property of the Brownian process, the  $\xi_i$  are serially independent and  $E[\xi_i] = 0$ . Also, the fact that the Brownian process is continuous almost everywhere on  $(t_i, t_{i+1}]$ , permits exchange of integration order which allows evaluation of variance,

$$\begin{aligned}V[\xi_i] &= \frac{\sigma^2}{2\beta} \int_{t_i}^{t_{i+1}} \int_{t_i}^{t_{i+1}} e^{-\beta u} e^{-\beta v} \\ &\quad \times E[\{W(e^{2\beta u}) - W(e^{2\beta t_i})\} \{W(e^{2\beta v}) - W(e^{2\beta t_i})\}] dv du \\ &= \frac{\sigma^2}{\beta^2} \left\{ \delta_i - \frac{2}{\beta} (1 - e^{-\beta \delta_i}) + \frac{1}{2\beta} (1 - e^{-2\beta \delta_i}) \right\}.\end{aligned}\tag{A.7}$$

The covariance between  $\xi_i$  and  $\zeta_i$  is also necessary for likelihood evaluation and can be calculated in a similar fashion to give,

$$C[\xi_i, \zeta_i] = \frac{\sigma^2}{2\beta^2} \{1 - 2e^{-\beta \delta_i} + e^{-2\beta \delta_i}\}.\tag{A.8}$$

#### *Random drift model*

The properties of the dual scale mean process model presented in the northern fur seal example can be readily derived given the results of the previous section. Before beginning, recall the definition of the mean process model

$$\begin{aligned}\nu(t) &= \gamma(t) + \vartheta(t) \\ &= \frac{\sigma_\gamma e^{-\beta t/\psi}}{\sqrt{2\beta/\psi}} W^{(\gamma)}(e^{2\beta/\psi}) + \frac{\sigma_\vartheta e^{-\beta t}}{\sqrt{2\beta}} W^{(\vartheta)}(e^{2\beta})\end{aligned}\tag{A.9}$$

where  $W^{(\gamma)}$  and  $W^{(\vartheta)}$  are independent Brownian motions and  $\psi > 1$  is a time scale multiplying factor. Note that we have, again, dropped the coordinate notation for simplicity.

Using the previous results, the transition equations for the state  $\boldsymbol{\alpha}_{i+1} = [\mu_{i+1}, \vartheta_{i+1}, \gamma_{i+1}]'$ , in reverse order, are

$$\begin{aligned}\gamma_{i+1} &= e^{-\beta\delta_i/\psi}\gamma_i + \omega_i \\ \vartheta_{i+1} &= e^{-\beta\delta_i}\vartheta_i + \zeta_i \\ \mu_{i+1} &= \mu_i + \vartheta_i \left( \frac{1 - e^{-\beta\delta_i}}{\beta} \right) + \gamma_i \psi \left( \frac{1 - e^{-\beta\delta_i/\psi}}{\beta} \right) + \xi_i.\end{aligned}\tag{A.10}$$

The state equation error variables are given by

$$\begin{aligned}\omega_i &= \frac{\sigma_\gamma e^{-\beta t_{i+1}/\psi}}{\sqrt{2\beta/\psi}} \{W^{(\gamma)}(e^{2\beta t_{i+1}/\psi}) - W^{(\gamma)}(e^{2\beta t_i/\psi})\} \\ \zeta_i &= \frac{\sigma e^{-\beta t_{i+1}}}{\sqrt{2\beta}} \{W^{(\vartheta)}(e^{2\beta t_{i+1}}) - W^{(\vartheta)}(e^{2\beta t_i})\} \\ \xi_i &= \frac{\sigma}{\sqrt{2\beta}} \int_{t_i}^{t_{i+1}} e^{-\beta u} \{W^{(\gamma)}(e^{2\beta u}) - W^{(\gamma)}(e^{2\beta t_i})\} du \\ &\quad + \frac{\sigma_\gamma}{\sqrt{2\beta/\psi}} \int_{t_i}^{t_{i+1}} e^{-\beta u/\psi} \{W^{(\vartheta)}(e^{2\beta u/\psi}) - W^{(\vartheta)}(e^{2\beta t_i/\psi})\} du.\end{aligned}\tag{A.11}$$

The variances and covariances given in the northern fur seal movement section are directly derived from results in the section above along with the independence of  $W^{(\gamma)}$  and  $W^{(\vartheta)}$ .

#### LITERATURE CITED

Durbin, J., and S. Koopman. 2001. Time Series Analysis by State Space Methods. Oxford University Press, Oxford, UK.
